# Supplementary material for: Structurally Novel Antiestrogens Elicit Differential Responses from Constitutively Active Mutant Estrogen Receptors in Breast Cancer Cells and Tumors
Source: Oxford University Press journal article supplement (doi:10.1158/0008-5472.can-17-1265), 2017-09-13
Supplement: 00085472can171265-sup-182625_2_supp_4209847_ggp1vf.pdf [file 00085472can171265-sup-182625_2_supp_4209847_ggp1vf.pdf]

## **Structurally novel antiestrogens elicit differential responses from constitutively active mutant estrogen receptors in breast cancer cells and tumors**

Yuechao Zhao<sup>1</sup>, Mary J. Laws<sup>1</sup>, Valeria Sanabria Guillen<sup>1</sup>, Yvonne Ziegler<sup>1</sup>, Jian Min<sup>2</sup>, Abhishek Sharma<sup>2\*</sup>, Sung Hoon Kim<sup>2</sup>, David Chu<sup>4</sup>, Ben Ho Park<sup>4</sup>, Steffi Oesterreich<sup>5</sup>, Chengjian Mao<sup>3</sup>, David J. Shapiro<sup>3</sup>, Kendall W. Nettles<sup>6</sup>, John A. Katzenellenbogen<sup>2</sup>, and Benita S. Katzenellenbogen<sup>1</sup>

### **Supplementary Figure Legends**

**Fig. S1 Dose-dependent inhibition of the growth of T47D cells by antiestrogen compounds with WT or mutant-ER $\alpha$  in tissue culture medium with 5% fetal bovine serum and  $3 \times 10^{-9}$  M E2.**

T47D cells with WT, Y537S- or D538G-ER $\alpha$  were cultured in E2-containing medium, and were treated with E2 ( $3 \times 10^{-9}$  M) and compounds (**A**, Fulv; **B**, 4-OHT; **C**, K-07; **D**, K-09; **E**, K-62) at the concentrations indicated ( $3 \times 10^{-11}$  to  $3 \times 10^{-6}$  M) for 6 days. Cell viability values are mean  $\pm$  SD of 3 determinations from 3 separate experiments.

**Fig. S2 Antiestrogen compounds K-07, K-09, K-62 and trans-hydroxy-tamoxifen (TOT) suppress the binding of SRC3 to wild type ER, Y537S-ER, and D538G-ER, in a dose-dependent fashion.** Site-specific labeled biotin-streptavidin/terbium ER-ligand binding domain constructs (donor) were primed to ~50% activity with estradiol and were then incubated with a fluorescein labeled SRC3 (acceptor). When the donor and acceptor fluorophores are in close proximity, they interact, and the resonance energy transferred from terbium to fluorescein is measured by time-resolved Fluorescence Resonance Energy Transfer (FRET). Increasing concentrations of E2 increase interaction of ER and SRC3, and show increased FRET, whereas increasing concentrations of K-07, K-09, K-62 and TOT reduce interaction of E2-ER and SRC3

and show reduced FRET. WT and mutant ERs required different E2 concentrations to be primed to ca. 50% activity, reflecting their differing levels of constitutive activities and differing affinities for E2; the priming concentration required for each receptor is given in square brackets in each panel.

**Fig. S3 Antiestrogen compounds suppress proliferation of breast cancer cells with heterozygous levels of mutant Y537S or D538G ER $\alpha$**

MCF7 or T47D cells containing 50% mutant ER $\alpha$  and 50% wild type ER $\alpha$  (**panels A,B**) were treated with E2 or compounds alone for 6 days at the concentrations indicated, and cell viability was measured. Values are mean  $\pm$  SD from 3 determinations from 3 separate experiments.

**Fig. S4 Compounds induce down-regulation of ER $\alpha$  in MCF7 and T47D breast cancer cells containing half mutant and half wild type ER $\alpha$**

ICW assay of ER $\alpha$  protein was performed in breast cancer cells treated for 24 h with Control Vehicle, E2, or compounds alone (**panels A,B**) at the concentrations indicated.

**Fig. S5 Suppression of ER $\alpha$ -regulated gene expressions in MCF7 and T47D breast cancer cells containing half mutant and half wild type ER $\alpha$**

After 24 h of Control Vehicle, E2 or compound treatment, cells were harvested and processed for qPCR analysis of the ER $\alpha$ -regulated genes GREB1 and PGR. Fold change of mRNA level was calculated relative to the vehicle treated cell samples, set at 1.

**Fig. S6 Treatment with antiestrogen compounds in vivo does not affect animal body weights**

Mice received daily Vehicle or 80 mg/kg of the compounds indicated by (**A**) sc injection or (**B**) oral gavage, and body weights of the mice bearing MCF7 xenograft tumors were monitored over time (2-way ANOVA, Bonferroni post-test,  $P > 0.05$ ,  $n = 8$  per group).

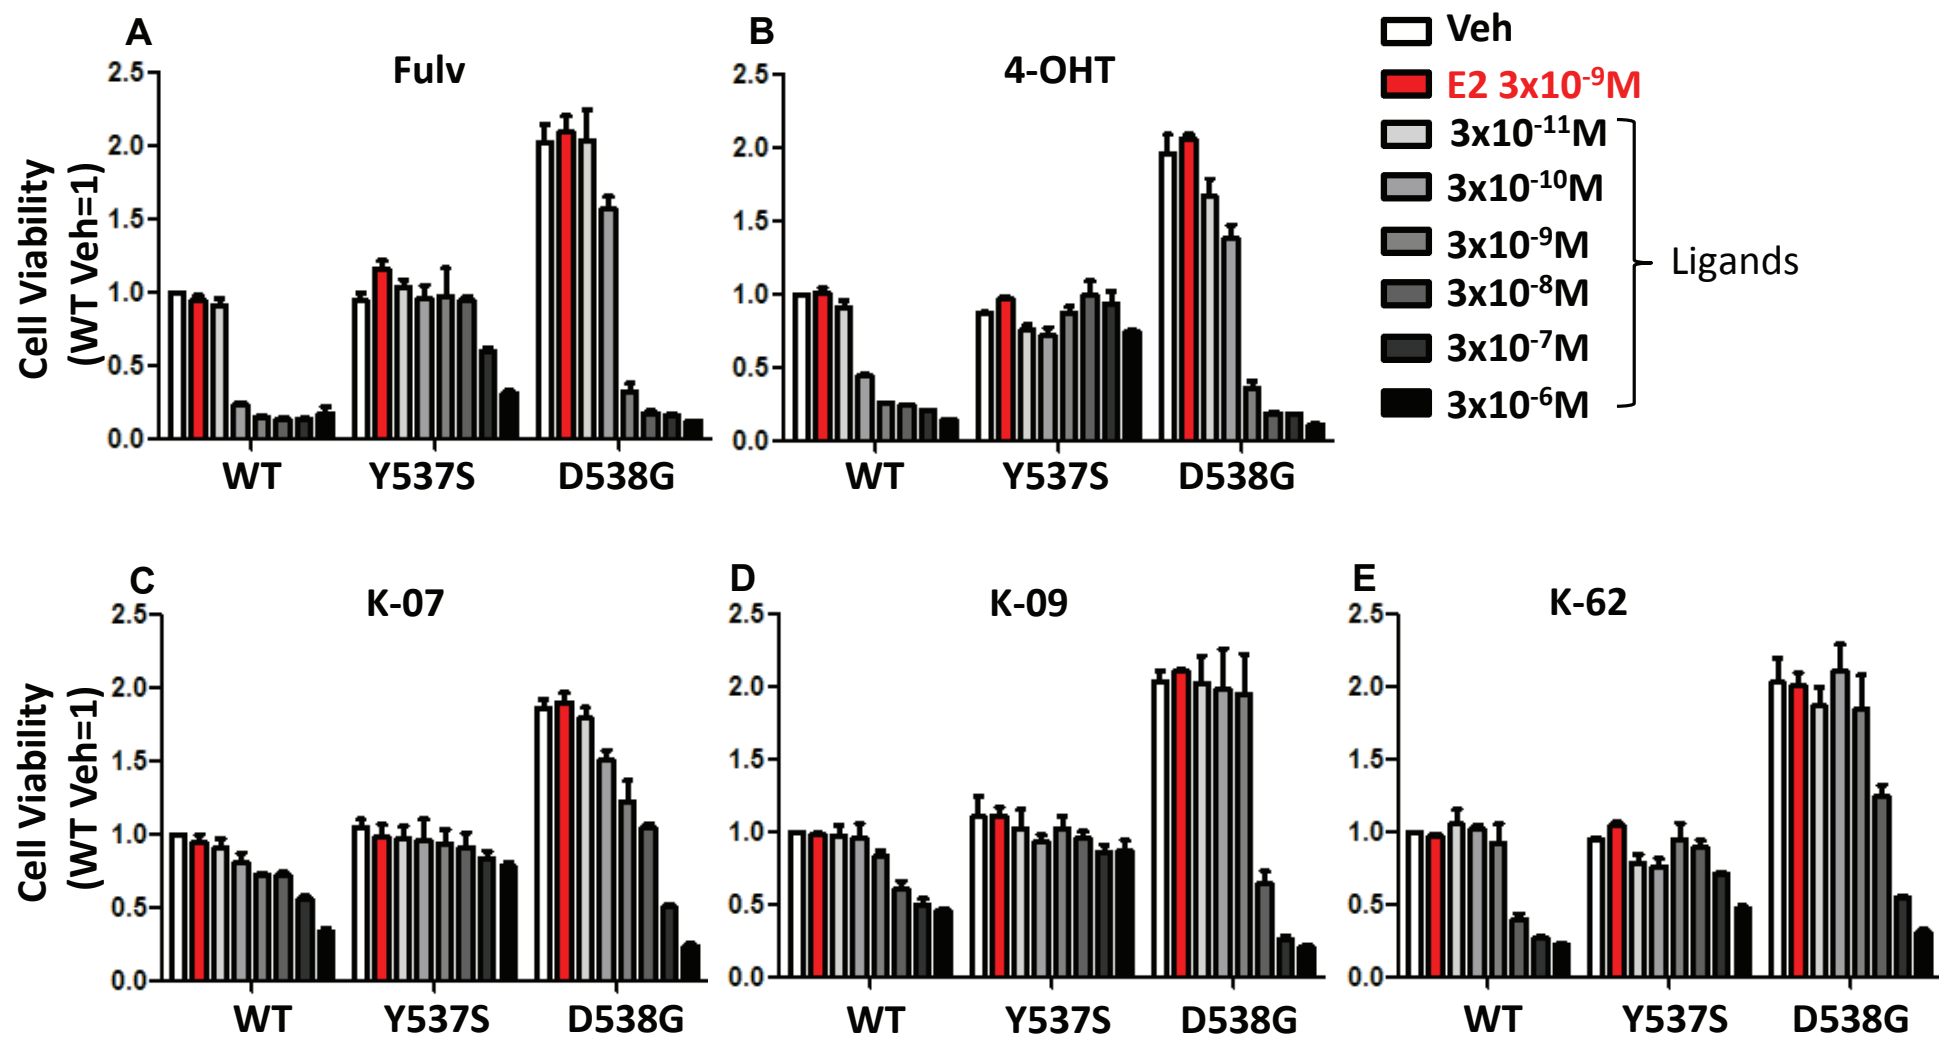

Figure S1

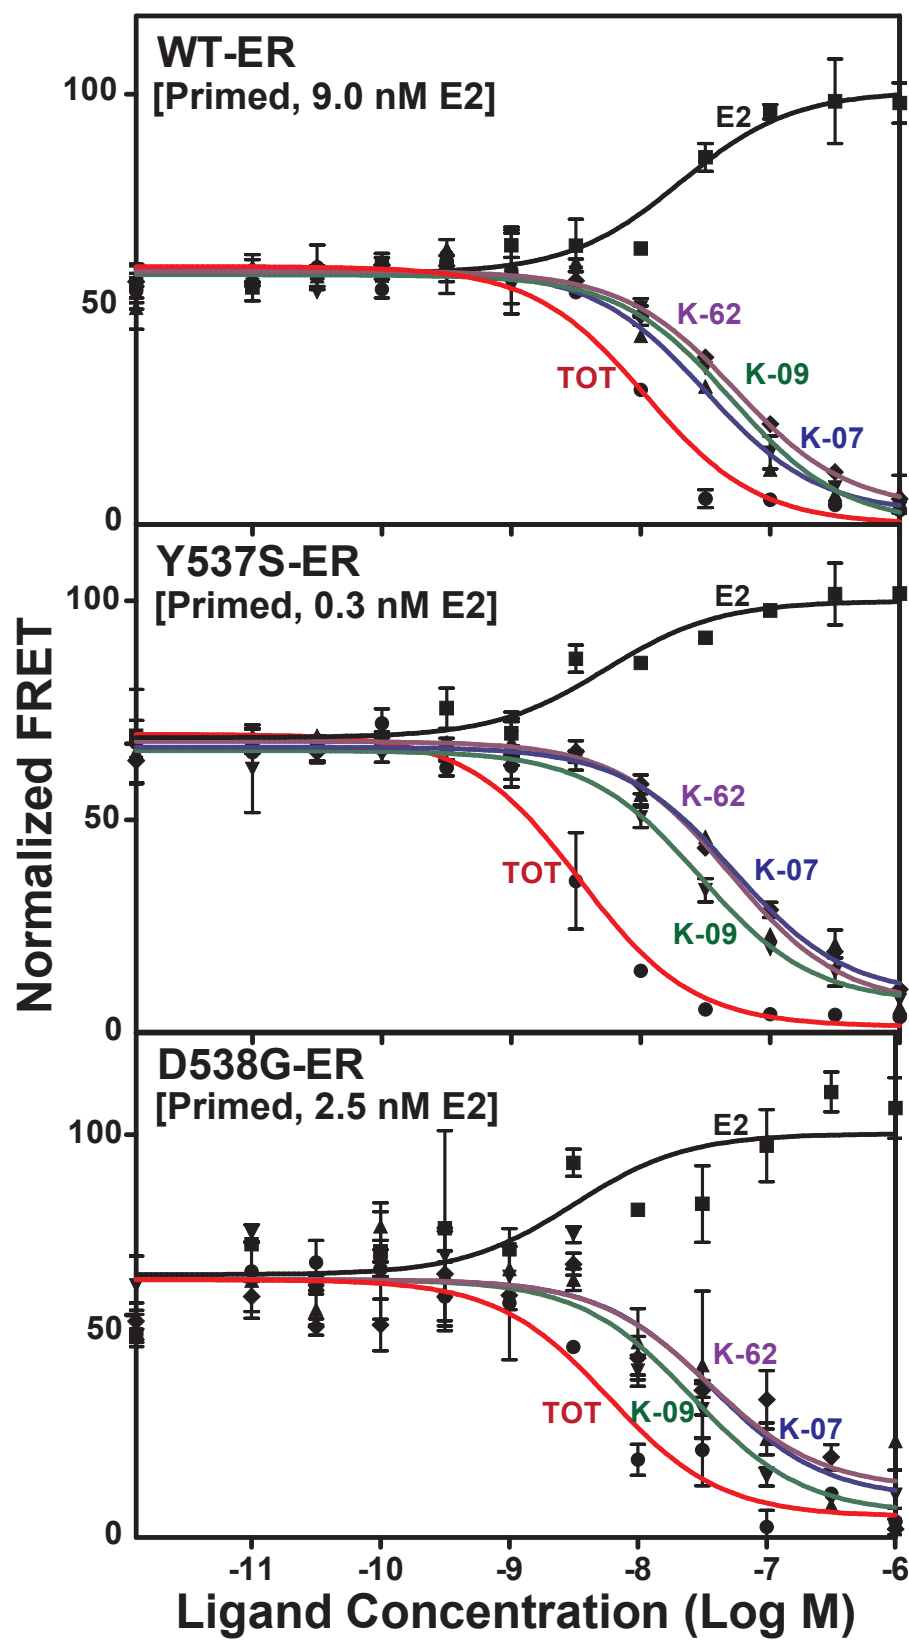

Figure S2

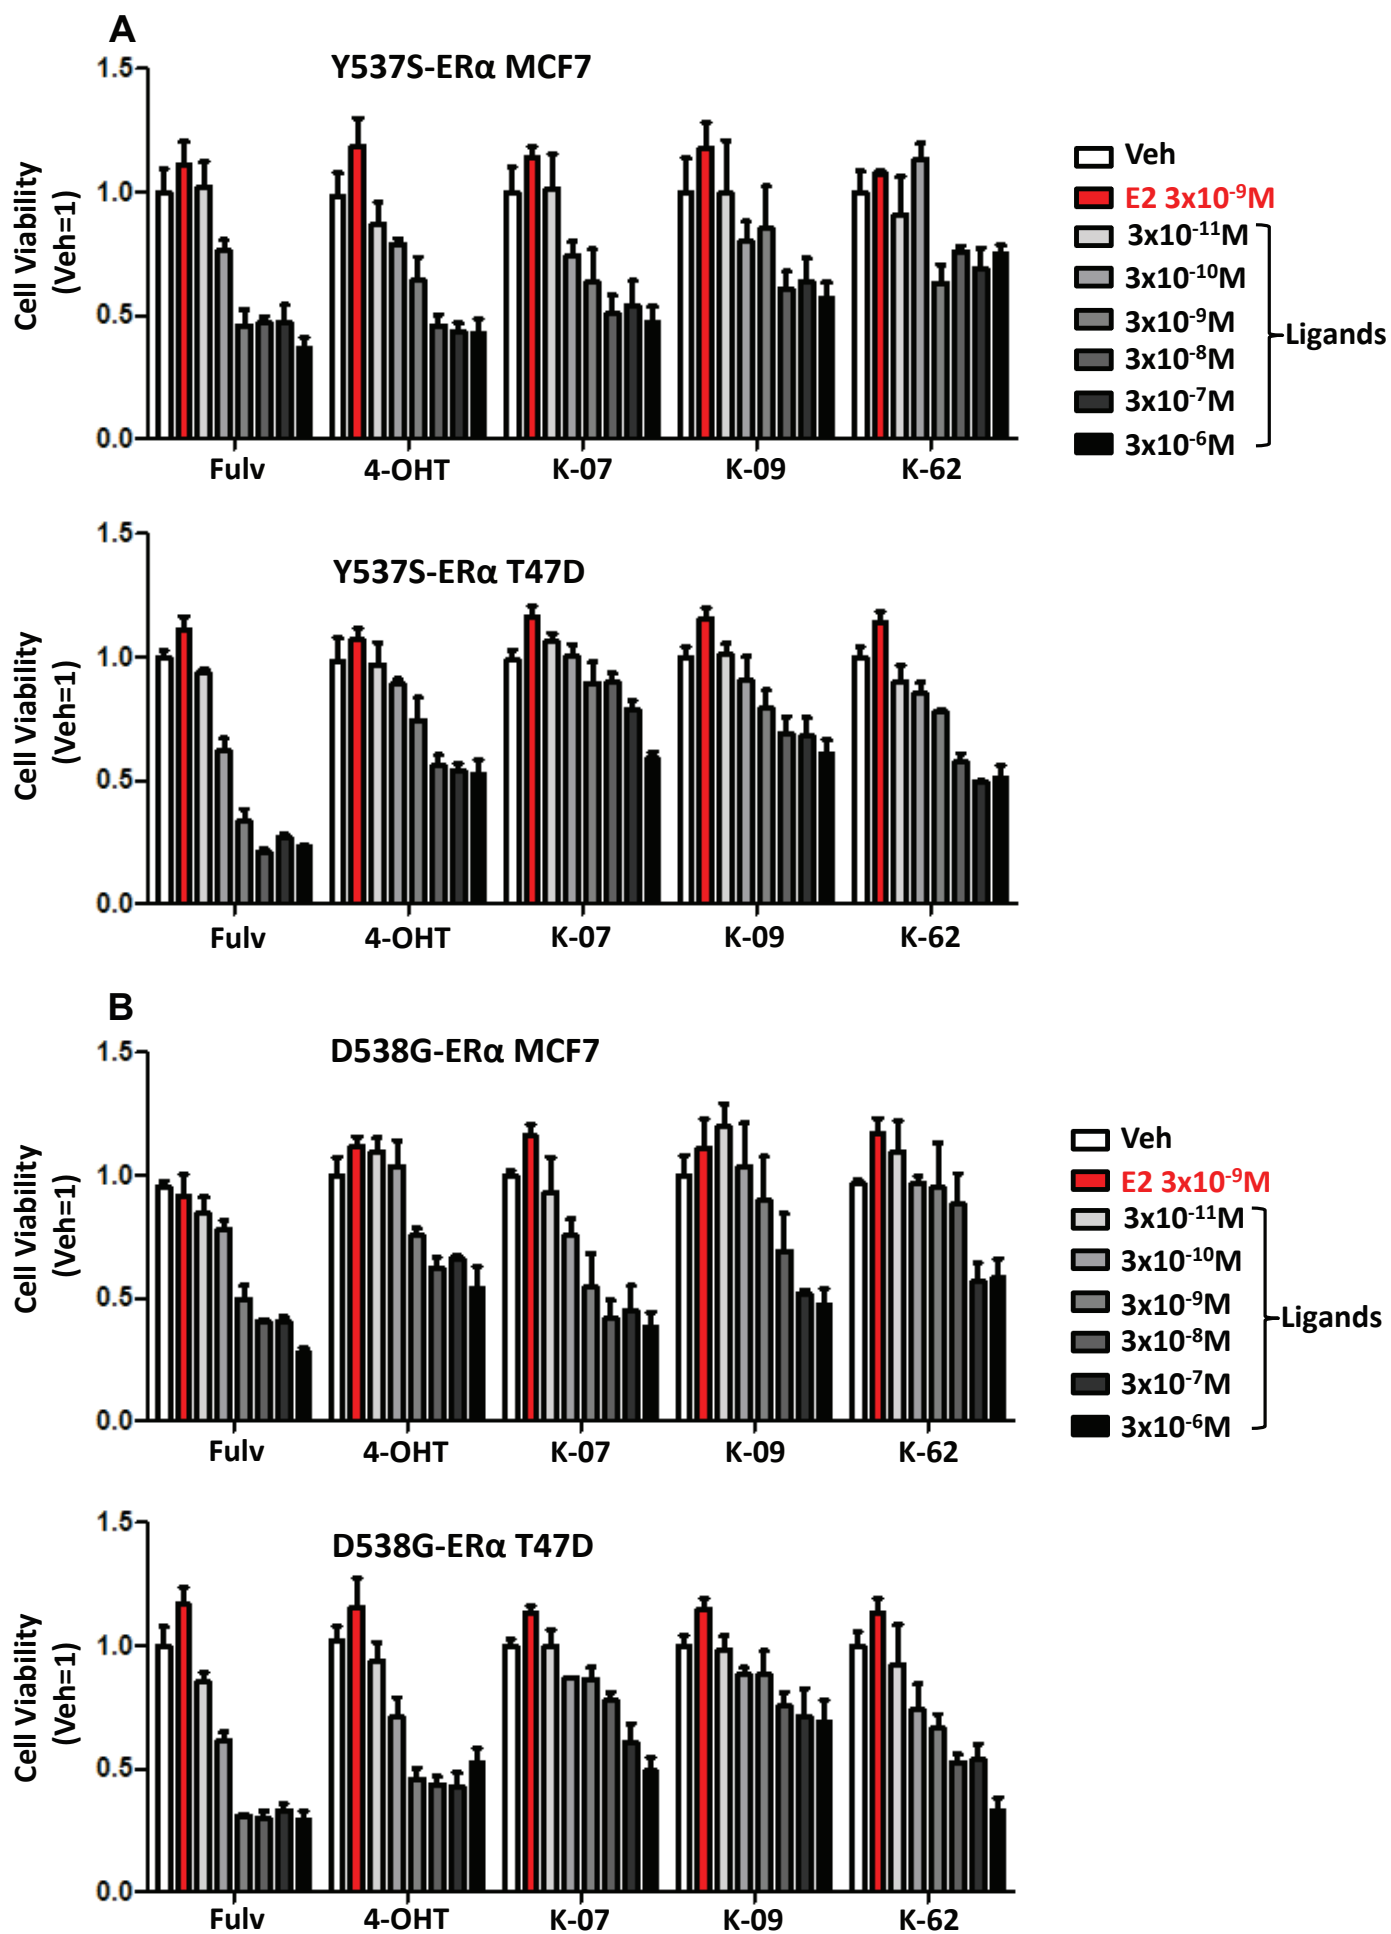

Figure S3

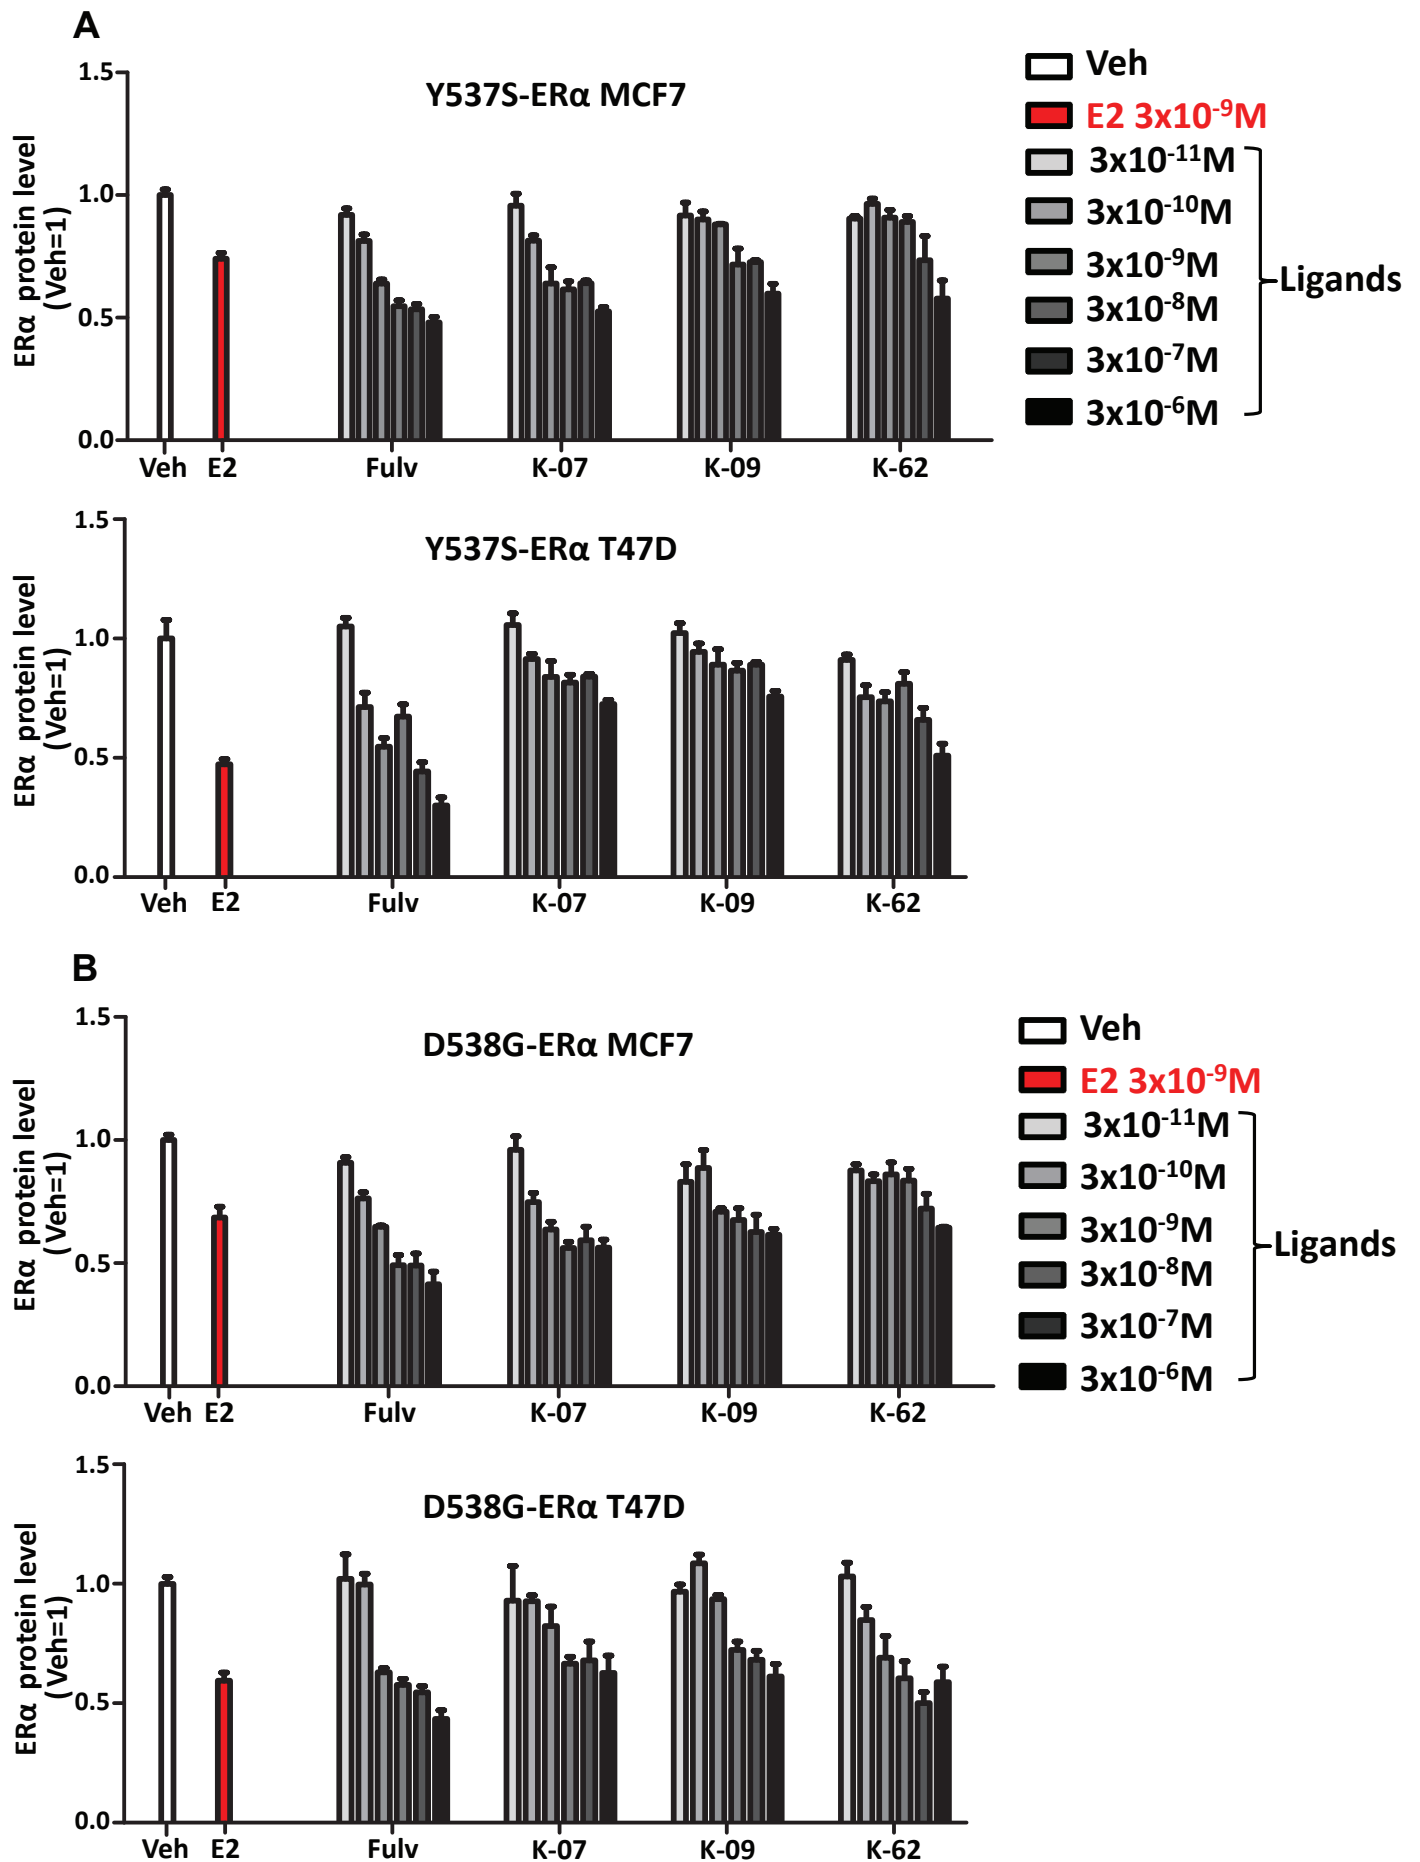

Figure S4

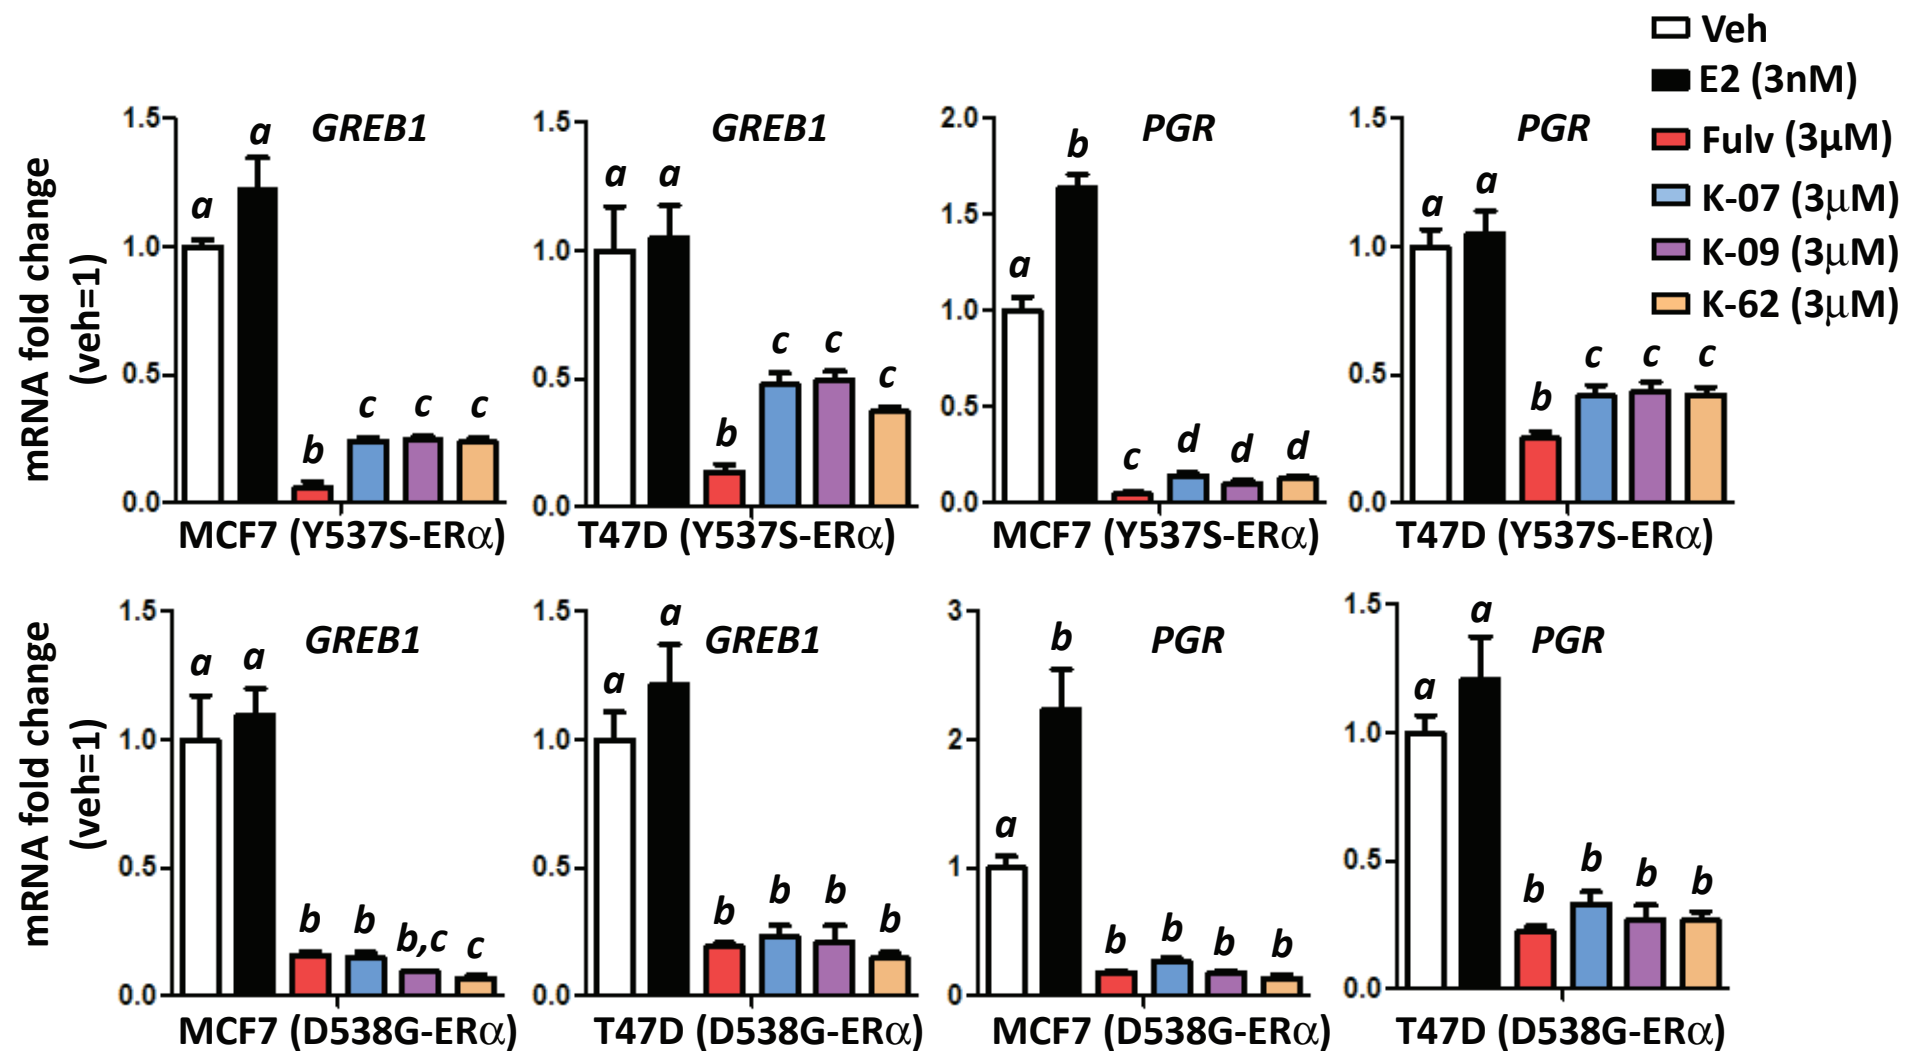

Figure S5

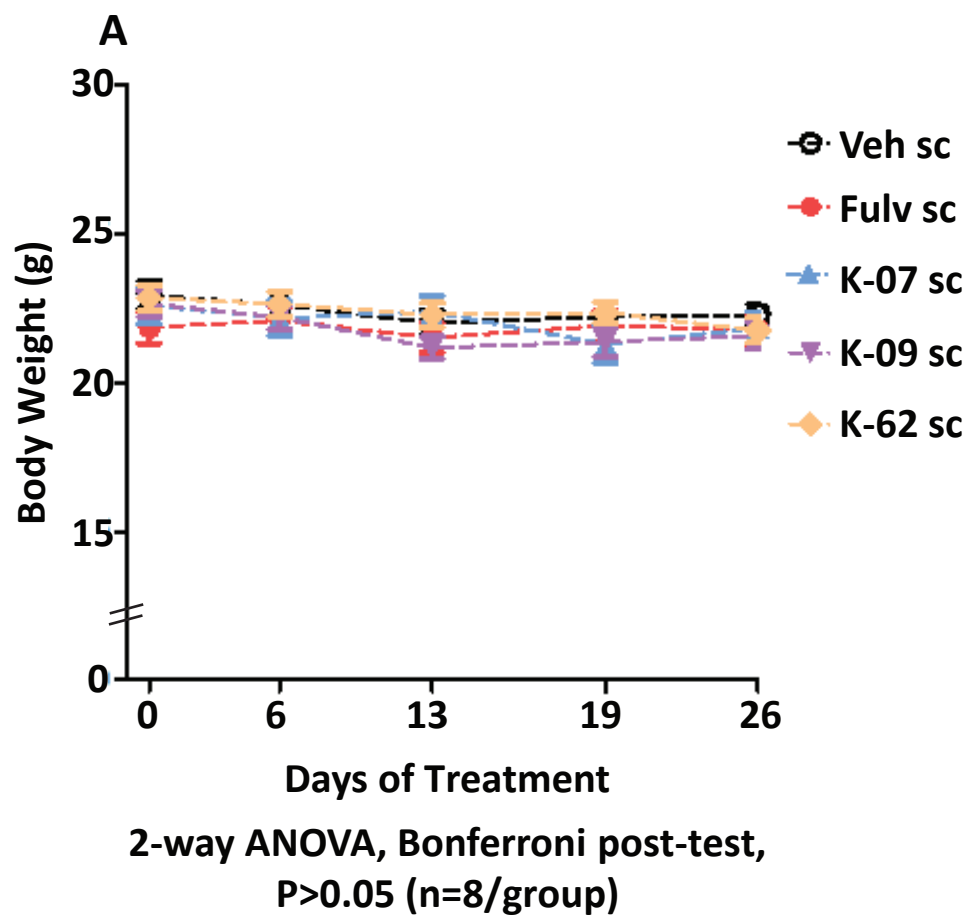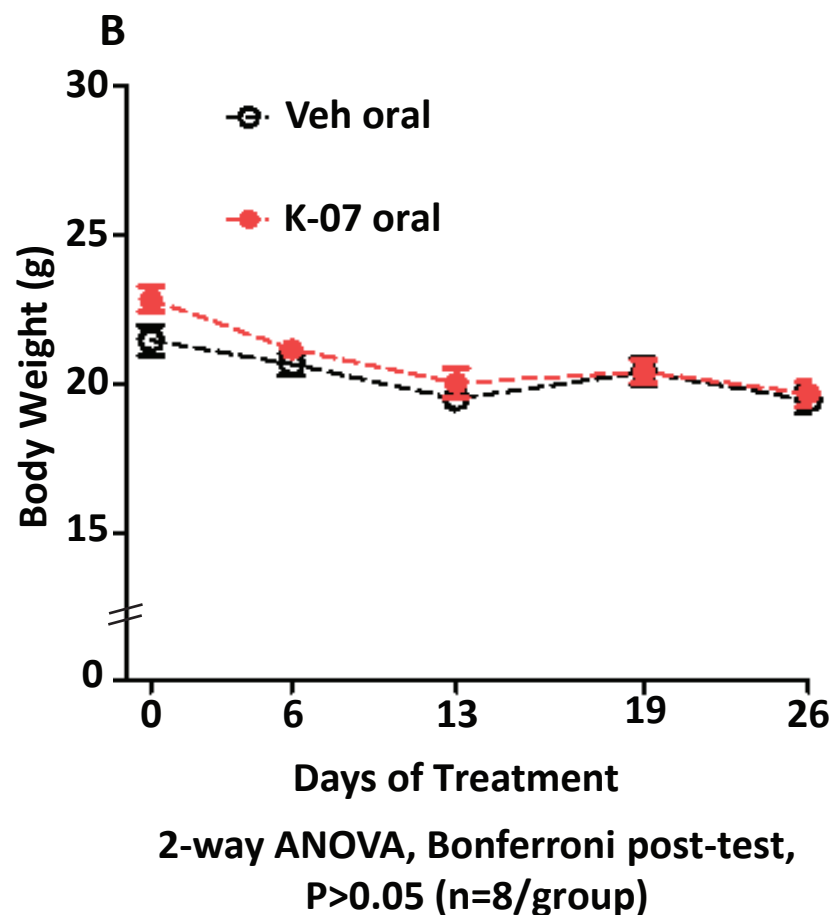

Figure S6
